# Supplementary material for: Modeling the mechanisms of coastal vegetation dynamics and ecosystem responses to changing water levels
Source: Copernicus journal article supplement (doi:10.5194/egusphere-2025-1544), 2025-04-25

## Supporting Information

Article title: Modeling the mechanisms of coastal vegetation dynamics and ecosystem responses to changing water levels

Junyan Ding,<sup>1</sup> Nate McDowell<sup>2,3</sup>, Vanessa Bailey<sup>2</sup>, Nate Conroy,<sup>4</sup> Donnie J. Day,<sup>5</sup> Yilin Fang,<sup>6</sup> Kenneth M. Kemner,<sup>7</sup> Matthew L. Kirwan,<sup>8</sup> Charlie D. Koven,<sup>9</sup> Matthew Kovach,<sup>5</sup> Patrick Megonigal,<sup>10</sup> Kendalynn A. Morris,<sup>11</sup> Teri O'Meara,<sup>12</sup> Stephanie C. Pennington,<sup>11</sup> Roberta B. Peixoto,<sup>5</sup> Peter Thornton,<sup>12</sup> Mike Weintraub,<sup>5</sup> Peter Regier,<sup>13</sup> Leticia Sandoval,<sup>5</sup> Fausto Machado-Silva,<sup>5</sup> Alice Stearns,<sup>10</sup> Nick Ward,<sup>13</sup> Stephanie J. Wilson<sup>10</sup>

Article acceptance date: [Click here to enter a date.](#)

The following Supporting Information is available for this article:

### Tables:

Table S1 List of major parameters of FATES-Hydro

Table S2 Marsh plant (grass) parameters

Table S3 measured %NSC in 2022 at Lake Erie site

### Figures:

Fig S1. Google Earth photos of the upland broadleaf forest at Lake Erie site (a) and conifer forest at Chesapeake Bay site (b).

Fig. S2 Saturation-induced root loss function, showing different root loss rates for plants not adapted to water-logging environments (solid blue line) and plants more adapted to water-logging environments (dashed red line). The solid blue line represents the root loss rate used in this study, controlled by specific parameters.

Fig S3. Observed and simulated hourly leaf net carbon assimilation rate (Anet) and leaf water potential (LWP) at upland and shoreline locations at Lake Erie site on July 15<sup>th</sup>. 2022

Fig S4. Measured and simulated hourly sap flow of upland (top) and shoreline (bottom) broadleaf trees during 2022 growing season at Lake Erie

Fig S5. Comparison of simulated growth rate and measured growth rate from tree cores at shoreline location (top) and upland location (bottom)

Table S1 List of major tree parameters of FATES-Hydro

| Symbol                                                                   | Source code name                             | Value                 |                    |                                  | Description                                                            | Source                        |
|--------------------------------------------------------------------------|----------------------------------------------|-----------------------|--------------------|----------------------------------|------------------------------------------------------------------------|-------------------------------|
|                                                                          |                                              | Conifer tree          | Broad leaf tree    | Units                            |                                                                        |                               |
| P50gs                                                                    | fates_hydr_p50_gs                            | -2.0                  | -1.6               | MPa                              | Leaf xylem water potential at half stomatal closure                    | Wang et al., 2021, this study |
| a <sub>gs</sub>                                                          | fates_hydr_avuln_gs                          | 5                     | 3.5                | unitless                         | shape parameter for stomatal closure                                   | Wang et al., 2021, this study |
| K <sub>max</sub>                                                         | fates_hydr_kmax_node                         | 0.7                   | 1.0                | kg/MPa/m/s                       | Maximum xylem conductivity per unit sap area                           | Ding et al. 2023b, this study |
| A                                                                        | fates_hydr_vg_alpha_node                     | 0.198392              | 0.07113            | Mpa <sup>-1</sup>                | Shape parameter of van Genuchten plant hydraulic model when soil PSU=0 | Ding et al. 2023b, this study |
| m, n                                                                     | fates_hydr_vg_m_node<br>fates_hydr_vg_n_node | 0.866,<br>2.765       | 0.8, 1.25          | unitless                         | Shape parameter of van Genuchten plant hydraulic model when soil PSU=0 | Ding et al. 2023b, this study |
| dA, dn                                                                   | fates_hydr_vg_da_sal<br>fates_hydr_vg_dn_sal | -0.00651<br>-0.122193 | -0.0065<br>-0.1222 | unitless                         | change of A and n of plant hydraulic model per unit PSU                | Ding et al. 2023b             |
| χ                                                                        | fates_hydr_p_taper                           | 0.333                 | 0.333              | unitless                         | xylem taper exponent                                                   | Christoffersen et al., 2016   |
| RWC <sub>res,l</sub> ,<br>RWC <sub>res,s</sub> ,<br>RWC <sub>res,r</sub> | fates_hydr_resid_node                        | 0.25,<br>0.325, 0.15  | 0.16,0.21,<br>0.21 | proportion                       | residual fraction of leaf, stem, root                                  | Christoffersen et al., 2016   |
| Θ <sub>sat,x</sub>                                                       | fates_hydr_thetas_node                       | 0.65                  | 0.72               | cm <sup>3</sup> /cm <sup>3</sup> | saturated water content of xylem                                       | Christoffersen et al., 2016   |

|                              |                                        |           |           |                      |                                                                 |                   |
|------------------------------|----------------------------------------|-----------|-----------|----------------------|-----------------------------------------------------------------|-------------------|
| $SLA_{max}$                  | fates_leaf_slamax                      | 0.014     | 0.0185    | $m^2/gC$             | Maximum Specific Leaf Area (SLA)                                | This study        |
| $SLA_{top}$                  | fates_leaf_slatop                      | 0.014     | 0.0185    | $m^2/gC$             | Specific Leaf Area (SLA) at top of canopy, projected area basis | This study        |
| $V_{cmax,25,top}$<br>(PSU=0) | fates_leaf_vcmax25top                  | 50        | 47        | $\mu mol CO_2/m^2/s$ | maximum carboxylation rate of Rub. at 25C, canopy top           | This study        |
| $g_0$                        | fates_leaf_stomatal_intercept          | 10000     | 10000     | $\mu mol H_2O/m^2/s$ | Minimum leaf stomatal conductance                               | calibrated        |
| $ra, rb$                     | fates_fnrt_prof_a<br>fates_fnrt_prof_b | 0.6, 1    | 0.6, 1    | unitless             | Root distribution parameters                                    | Ding et al. 2023b |
| $b$                          | fates_hydr_frt_loss_coe                | 1         | 1         | unitless             | Saturation root loss par.                                       | calibrated        |
| $k_s$                        | fates_hydr_frt_loss_exp                | 0.02      | 0.02      | unitless             | Saturation root loss par.                                       | calibrated        |
| $k_{ex}$                     | fates_hydr_k_salex                     | 0.80      | 0.80      | ratio                | root salt exclusion ratio                                       | Ding et al. 2023b |
| $kr_{sal}$                   | fates_hydr_frt_loss_salk               | 0.0000075 | 0.0000075 | unitless             | salinity root loss rate par.                                    | Ding et al. 2023b |
| $cr_{sal}$                   | fates_hydr_frt_loss_salkr              | 3.5       | 3.5       | PSU                  | salinity root loss threshold                                    | Ding et al. 2023b |
| $m_{cs}$                     | fates_mort_scalar_starvation           | 1.2       | 1.2       | N/N/Year             | maximum carbon starvation mortality rate                        | Ding et al. 2023b |
| $m_{hf}$                     | fates_mort_scalar_hydraulic_failure    | 1.2       | 1.2       | N/N/Year             | maximum hydraulic failure mortality rate                        | Ding et al. 2023b |

Table S2 Marsh plant (grass) parameters

| Parameter | description                                          | value  | unit                                            | source               |
|-----------|------------------------------------------------------|--------|-------------------------------------------------|----------------------|
| w_max     | maximum width                                        | 35     | cm                                              | this study           |
| bl2w_slp  | slope of leaf biomass to width power law function    | 0.0747 | unitless                                        | this study           |
| bl2w_exp  | exponent of leaf biomass to width power law function | 2.1555 | unitless                                        | this study           |
| h2w_slp   | slope of height to width power law function          | 41.96  | unitless                                        | this study           |
| h2w_exp   | exponent of height to width power law function       | 0.5126 | unitless                                        | this study           |
| bbslope   | Ball-Berry leaf conductance slope                    | 9      | unitless                                        | O'Meara et al., 2021 |
| bbopt     | Ball-Berry minimum leaf conductance                  | 10000  | $\mu\text{mol H}_2\text{O}/\text{m}^2/\text{s}$ | O'Meara et al., 2022 |
| Vcmax,25  | maximum carboxylation rate of Rub. at 25C            | 55     | $\text{mmol CO}_2/\text{m}^2/\text{s}$          | O'Meara et al., 2023 |
| SLA       | specific leaf area                                   | 0.04   | $\text{m}^2/\text{gC}$                          | O'Meara et al., 2024 |

Table S3 measured %NSC in 2022 at Lake Erie site

| Location  |         | Glucose | Fructose | Sucrose | Starch | Total  |
|-----------|---------|---------|----------|---------|--------|--------|
| upland    | foliage | 0.159%  | 0.122%   | 3.469%  | 0.334% | 4.084% |
|           | wood    | 0.041%  | 0.367%   | 2.603%  | 1.426% | 4.437% |
| shoreline | foliage | 0.157%  | 0.155%   | 5.024%  | 0.850% | 8.521% |
|           | wood    | 0.031%  | 0.405%   | 3.423%  | 2.459% | 6.319% |

Fig S1. © Google Earth photos of the upland broadleaf forest at Lake Erie site (a) and conifer forest at Chesapeake Bay site (b).

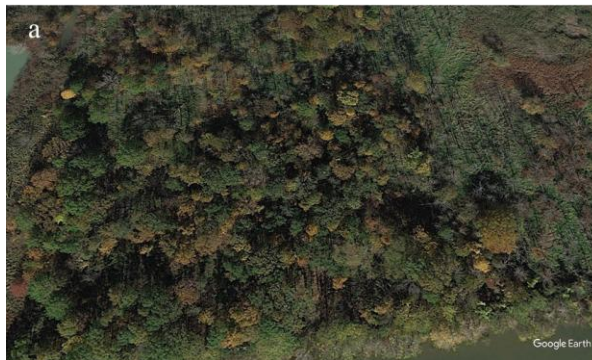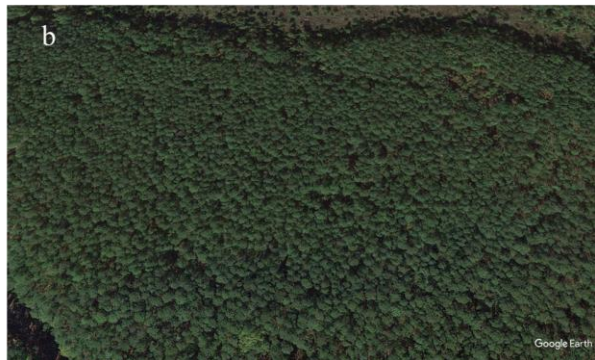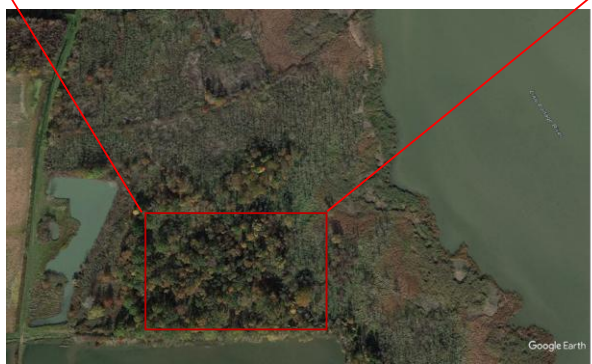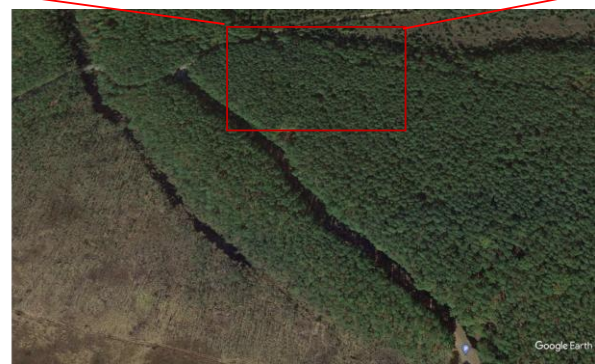

Fig. S2 Saturation-induced root loss function, showing different root loss rates for plants not adapted to water-logging environments (solid blue line) and plants more adapted to water-logging environments (dashed red line). The solid blue line represents the root loss rate used in this study, controlled by specific parameters.

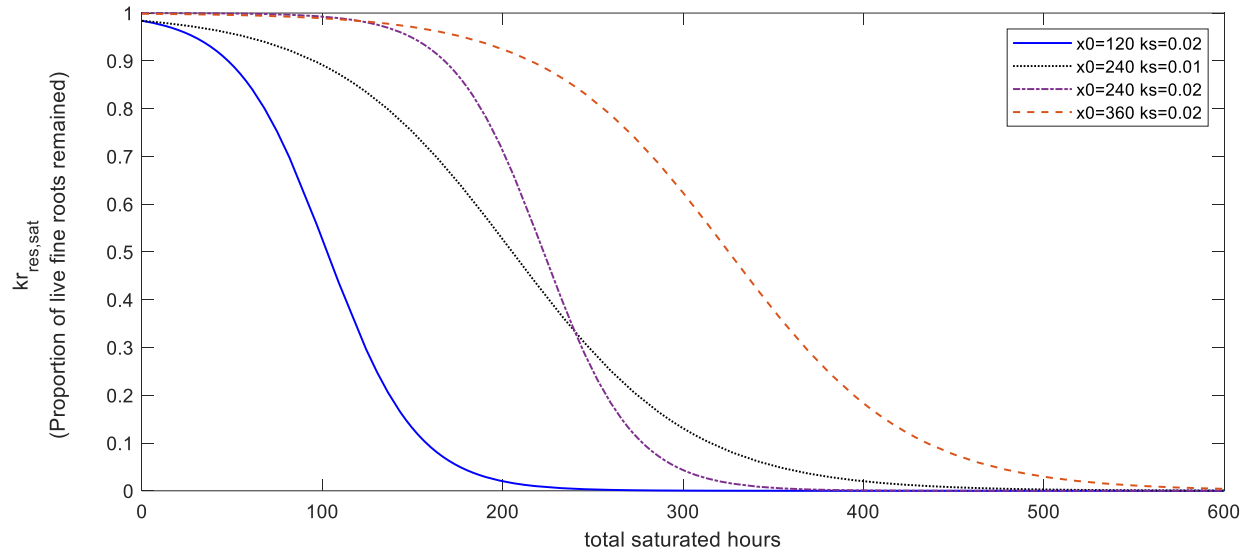

Fig S3. Observed and simulated hourly leaf net carbon assimilation rate (Anet) and leaf water potential (LWP) at upland and shoreline locations at Lake Erie site on July 15<sup>th</sup>, 2022

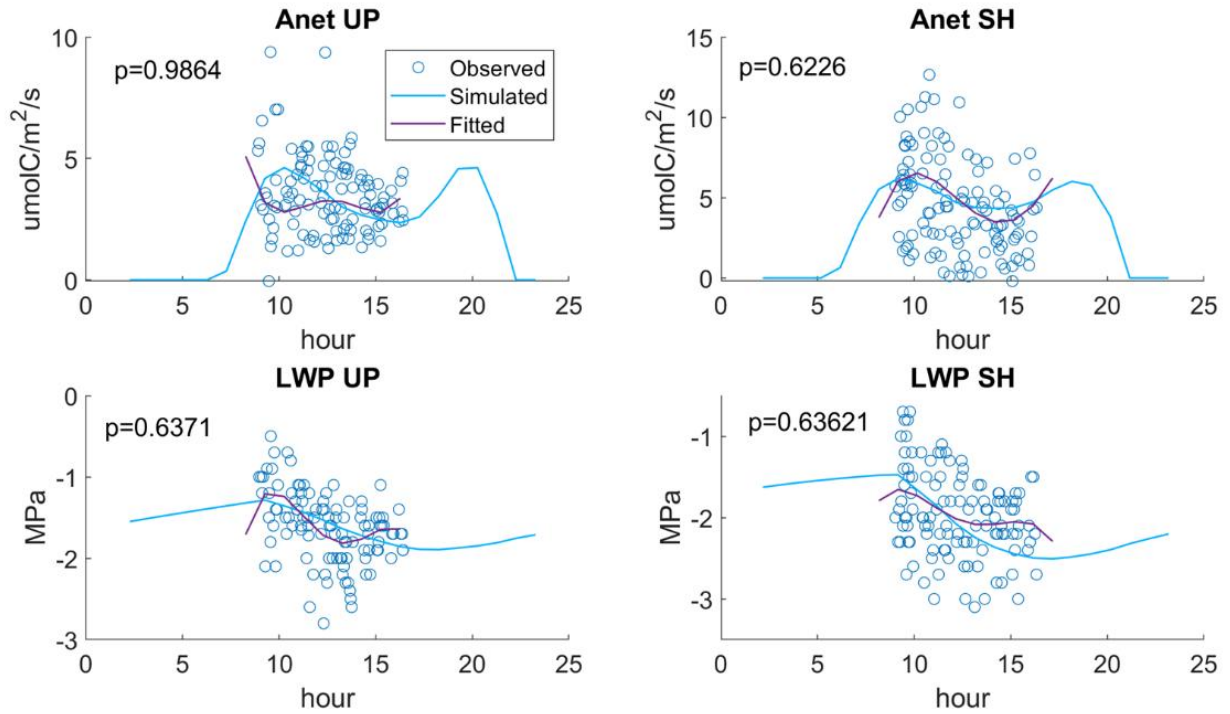

Fig S4. Measured and simulated hourly sap flow of upland (top) and shoreline (bottom) broadleaf trees during 2022 growing season at Lake Erie

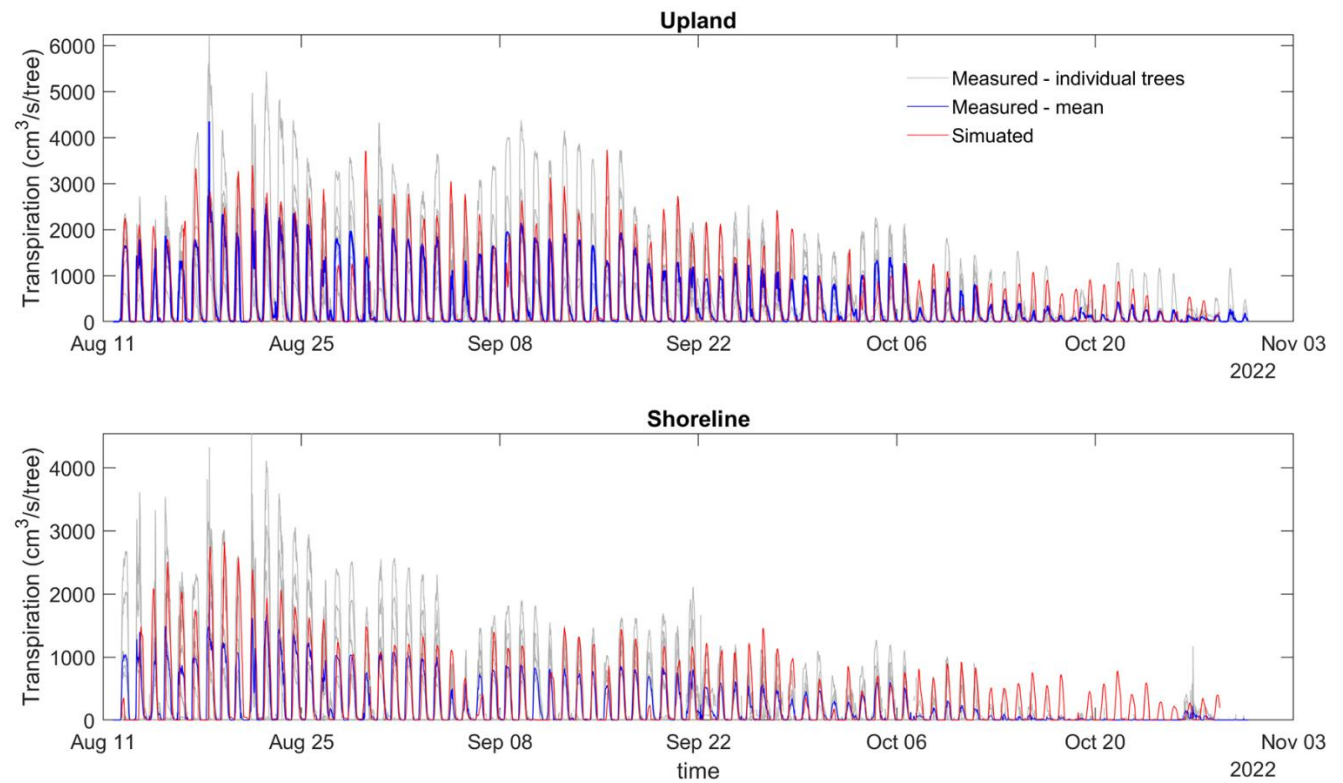



Fig S5. Comparison of simulated growth rate and measured growth rate from tree cores at shoreline location (top) and upland location (bottom)

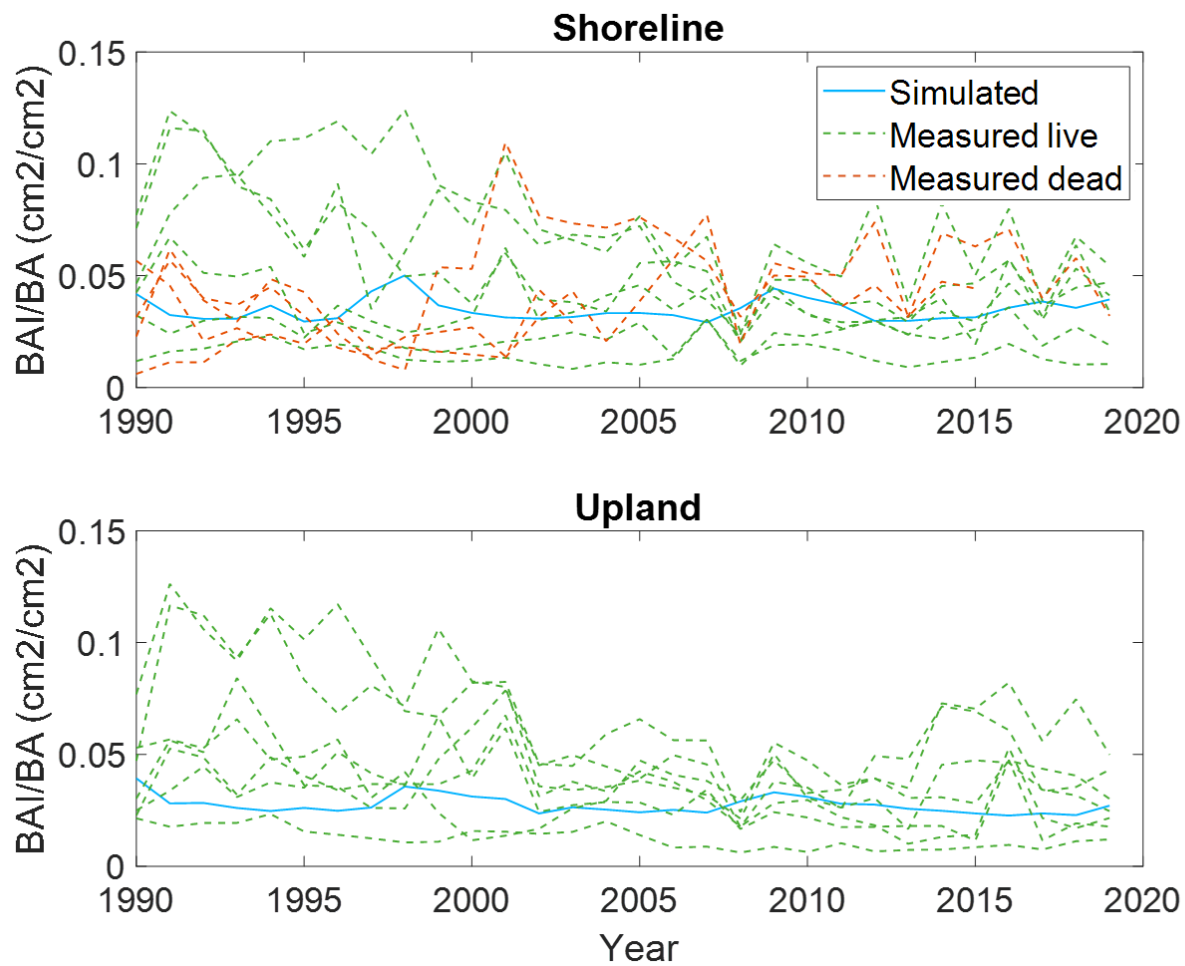

Supplement: Supplementary file 1 [file egusphere-2025-1544-supplement.pdf]
